# Supplementary material for: PopB-PcrV Interactions Are Essential for Pore Formation in the Pseudomonas aeruginosa Type III Secretion System Translocon
Source: PubMed Central journal article supplement (PMC9600203; doi:10.1128/mbio.02381-22), 2022-09-26
Supplement: mbio.02381-22-s0008.pdf [file mbio.02381-22-s0008.pdf]

**Table S1. Strains and Plasmids**

| Strain # | Genotype                                                                                                                                 | Ref.            |
|----------|------------------------------------------------------------------------------------------------------------------------------------------|-----------------|
| RP2318   | PAO1F $\Delta$ exsE $\Delta$ exoT $\Delta$ exoY                                                                                          | Cisz 2008       |
| RP3624   | PAO1F $\Delta$ exsE $\Delta$ exoT $\Delta$ exoY $\Delta$ prcHpopBD pcrV+                                                                 | Armentrout 2016 |
| RP6425   | PAO1F $\Delta$ exsE $\Delta$ exoT $\Delta$ exoY $\Delta$ prcHpopBD $\Delta$ prcV:: <i>prcV</i> (acrVtip)                                 | This study      |
| RP6166   | PAO1F $\Delta$ exsE $\Delta$ exoT $\Delta$ exoY $\Delta$ prcHpopBD $\Delta$ prcV:: <i>prcV</i> (N)- <i>prcV</i> (C)                      | This study      |
| RP7595   | PAO1F $\Delta$ exsE $\Delta$ exoT $\Delta$ exoY $\Delta$ prcHpopBD $\Delta$ prcGV:: <i>prcGV</i>                                         | This study      |
| RP3223   | PAO1F $\Delta$ exsE $\Delta$ exoT $\Delta$ exoY $\Delta$ prcV2                                                                           | This study      |
| RP2349   | PAO1F $\Delta$ exsE $\Delta$ exoT $\Delta$ exoY <i>exoS</i> (R146K/E379D/E381D)                                                          | Cisz 2008       |
| RP3670   | PAO1F $\Delta$ exsE $\Delta$ exoT $\Delta$ exoY <i>exoS</i> (R146K/E379D/E381D) $\Delta$ prcHpopBD pcrV+                                 | Armentrout 2016 |
| RP11222  | PAO1F $\Delta$ exsE $\Delta$ exoT $\Delta$ exoY <i>exoS</i> (R146K/E379D/E381D) $\Delta$ prcHpopBD $\Delta$ prcV:: <i>prcV</i> (acrVtip) | This study      |
| RP6370   | PAO1F $\Delta$ exsE $\Delta$ exoT $\Delta$ exoY <i>exoS</i> (GAP-/ADPR-) $\Delta$ prcHpopBD pcrV+                                        | Armentrout 2016 |
| RP11226  | PAO1F $\Delta$ exsE $\Delta$ exoT $\Delta$ exoY <i>exoS</i> (GAP-/ADPR-) $\Delta$ prcHpopBD $\Delta$ prcV:: <i>prcV</i> (acrVtip)        | This study      |
| RP2317   | PAO1F $\Delta$ exsE $\Delta$ exoS $\Delta$ exoT $\Delta$ exoY                                                                            | Cisz 2008       |
| RP11946  | PAO1F $\Delta$ exsE $\Delta$ exoS $\Delta$ exoT $\Delta$ exoY $\Delta$ prcHpopBD pcrV+                                                   | This study      |
| RP11948  | PAO1F $\Delta$ exsE $\Delta$ exoS $\Delta$ exoT $\Delta$ exoY $\Delta$ prcHpopBD $\Delta$ prcV:: <i>prcV</i> (acrVtip)                   | This study      |
| RP12517  | PAO1F $\Delta$ exsE $\Delta$ exoT $\Delta$ exoY S+ $\Delta$ prcHpopBD $\Delta$ prcV:: <i>prcV</i> (acrVtip-trim)                         | This study      |
| RP12661  | PAO1F $\Delta$ exsE $\Delta$ exoT $\Delta$ exoY <i>exoS</i> (GAP-/ADPR-) $\Delta$ prcHpopBD pcrV(Q87C)                                   | This study      |
| RP12598  | PAO1F $\Delta$ exsE $\Delta$ exoT $\Delta$ exoY <i>exoS</i> (GAP-/ADPR-) $\Delta$ prcHpopBD pcrV(S202C)                                  | This study      |

| Plasmid name                            | Description                                                                                                                        | Hybrid | Reference       |
|-----------------------------------------|------------------------------------------------------------------------------------------------------------------------------------|--------|-----------------|
| pPSV37                                  | <i>colE1</i> origin, <i>gentR</i> , PA origin, <i>oriT</i> , <i>lacUV5</i> promoter, <i>lacIq</i>                                  |        | Lee 2010        |
| pEXG2                                   | allelic exchange vector, <i>colE1</i> origin, <i>oriT</i> , <i>gentR</i> , <i>sacB</i>                                             |        | Rietsch 2005    |
| pPGEH                                   | derived from pPSV37, <i>prcG</i> promoter, <i>gentR</i> , BbvCI site, polylinker, <i>colE1</i> origin, PA origin                   |        | This study      |
| pEXG2- $\Delta$ prcHpopBDpopD           | allelic exchange plasmid deleting <i>prcH</i> codon 5 to <i>popD</i> codon 268                                                     |        | Tomalka 2012    |
| pEXG2- <i>prcV</i> (acrVtip)            | allelic exchange plasmid for <i>prcV</i> ::Atip                                                                                    |        | This study      |
| pEXG2- <i>prcV</i> (N)- <i>prcV</i> (C) | allelic exchange plasmid for <i>prcV</i> ::Acollar                                                                                 |        | This study      |
| pEXG2- $\Delta$ prcV:: <i>prcV</i>      | allelic exchange plasmid for <i>prcV</i> ::AcrV                                                                                    |        | This study      |
| pEXG2- $\Delta$ prc1                    | allelic exchange plasmid deleting codons 10–81 of <i>prc1</i>                                                                      |        | Tomalka 2012    |
| pEXG2-Atip-trim                         | allelic exchange plasmid for <i>prcV</i> ::Atip-trim                                                                               |        | This study      |
| pEXG2- $\Delta$ prcV2                   | allelic exchange plasmid deleting <i>prcV</i> codons 4-180                                                                         |        | Cisz 2008       |
| pP37- <i>acrHprcH-popBD</i>             | Plasmid encoding <i>acrH</i> , <i>prcH</i> , <i>popB</i> and <i>popD</i> under the control of the <i>lacUV5</i> promoter in pPSV37 |        | Armentrout 2016 |
| pP37- <i>acrHprcH-aopBD</i>             | Plasmid encoding <i>acrH</i> , <i>prcH</i> , <i>aopB</i> and <i>aopD</i> under control of the <i>lacUV5</i> promoter in pPSV37     |        | This study      |
| pP37- <i>acrHprcH-popB-aopD</i>         | Plasmid encoding <i>acrH</i> , <i>prcH</i> , <i>popB</i> and <i>aopD</i> under control of the <i>lacUV5</i> promoter in pPSV37     |        | This study      |
| pP37- <i>acrHprcH-aopBpopD</i>          | Plasmid encoding <i>acrH</i> , <i>prcH</i> , <i>aopB</i> and <i>popD</i> under control of the <i>lacUV5</i> promoter in pPSV37     |        | This study      |
| pP37- <i>acrHprcHpopD</i>               | Plasmid encoding <i>acrH</i> , <i>prcH</i> , and <i>popD</i> under control of the <i>lacUV5</i> promoter in pPSV37                 |        | This study      |
| pP37- <i>acrHprcHpopB</i>               | Plasmid encoding <i>acrH</i> , <i>prcH</i> and <i>popB</i> under control of the <i>lacUV5</i> promoter in pPSV37                   |        | This study      |

|                                                            |                                                                                                                                                                                                                                                                 |      |            |
|------------------------------------------------------------|-----------------------------------------------------------------------------------------------------------------------------------------------------------------------------------------------------------------------------------------------------------------|------|------------|
| pP37- <i>acrHpcrH</i> -APB 169- <i>popD</i>                | Plasmid encoding <i>acrH</i> , <i>pcrH</i> , a <i>aopB</i> (1-161G)- <i>popB</i> (169K-390) hybrid and <i>popD</i> under the control of the lacUV5 promoter in pPSV37, hybrid "B1"                                                                              | B1   | This study |
| pP37- <i>acrHpcrH</i> -PAB 250- <i>popD</i>                | Plasmid encoding <i>acrH</i> , <i>pcrH</i> , <i>popD</i> and a <i>popB</i> (1-250G)- <i>aopB</i> (244S-390) hybrid under the control of the lacUV5 promoter in pPSV37, hybrid "B2"                                                                              | B2   | This study |
| pP37- <i>acrHpcrH</i> -PAPB 168-251- <i>popD</i>           | Plasmid encoding <i>acrH</i> , <i>pcrH</i> , <i>popD</i> and a <i>popB</i> (1-168A)- <i>aopB</i> (162K-243G)- <i>popB</i> (251G-390) hybrid under the control of the lacUV5 promoter in pPSV37, hybrid "B3"                                                     | B3   | This study |
| pP37- <i>acrHpcrH</i> -APAB 183-250- <i>popD</i>           | Plasmid encoding <i>acrH</i> , <i>pcrH</i> , <i>popD</i> and a <i>aopB</i> (1-175I)- <i>popB</i> (183G-250G)- <i>aopB</i> (244S-390) hybrid under the control of the lacUV5 promoter in pPSV37, hybrid "B4"                                                     | B4   | This study |
| pP37- <i>acrHpcrH</i> -APAPB 115-250-298- <i>popD</i>      | Plasmid encoding <i>acrH</i> , <i>pcrH</i> , <i>popD</i> and a <i>aopB</i> (1-107L)- <i>popB</i> (115A-250G)- <i>aopB</i> (244S-297V)- <i>popB</i> (298-390) hybrid under the control of the lacUV5 promoter in pPSV37, hybrid "B5"                             | B5   | This study |
| pP37- <i>acrHpcrH</i> -PAPAB 114-169-297- <i>popD</i>      | Plasmid encoding <i>acrH</i> , <i>pcrH</i> , <i>popD</i> and a <i>popB</i> (1-114L)- <i>aopB</i> (108G-161G)- <i>popB</i> (169K-296H)- <i>aopB</i> (270A-390) hybrid under the control of the lacUV5 promoter in pPSV37, hybrid "B6"                            | B6   | This study |
| pP37- <i>acrHpcrH</i> -PAPAPB 114-169-297-333- <i>popD</i> | Plasmid encoding <i>acrH</i> , <i>pcrH</i> , <i>popD</i> and a <i>popB</i> (1-114L)- <i>aopB</i> (108G-161G)- <i>popB</i> (169K-296H)- <i>aopB</i> (270A-332A)- <i>popB</i> (333D-390) hybrid under the control of the lacUV5 promoter in pPSV37, hybrid "B7"   | B7   | This study |
| pP37- <i>acrHpcrH</i> -PAPAPB 114-169-312-330- <i>popD</i> | Plasmid encoding <i>acrH</i> , <i>pcrH</i> , <i>popD</i> and a <i>popB</i> (1-114L)- <i>aopB</i> (108G-161G)- <i>popB</i> (169K-311V)- <i>aopB</i> (312S-332A)- <i>popB</i> (333D-390) hybrid under the control of the lacUV5 promoter in pPSV37, hybrid "B8"   | B8   | This study |
| pP37- <i>acrHpcrH</i> -PAPB 114-150- <i>popD</i>           | Plasmid encoding <i>acrH</i> , <i>pcrH</i> , <i>popD</i> and a <i>popB</i> (1-114L)- <i>aopB</i> (108G-143K)- <i>popB</i> (150K-390) hybrid under the control of the lacUV5 promoter in pPSV37, hybrid "B9"                                                     | B9   | This study |
| pP37- <i>acrHpcrH</i> -PAPB 312-330- <i>popD</i>           | Plasmid encoding <i>acrH</i> , <i>pcrH</i> , <i>popD</i> and a <i>popB</i> (1-311V)- <i>aopB</i> (312S-330A)- <i>popB</i> (331Q-390) hybrid under the control of the lacUV5 promoter in pPSV37, hybrid "B10"                                                    | B10  | This study |
| pP37- <i>acrHpcrH</i> -PAPAPB 114-150-312-330- <i>popD</i> | Plasmid encoding <i>acrH</i> , <i>pcrH</i> , <i>popD</i> and a <i>popB</i> (1-114L)- <i>aopB</i> (108G-143K)- <i>popB</i> (150K-311V)- <i>aopB</i> (312S-330A)- <i>popB</i> (331Q-390) hybrid under the control of the lacUV5 promoter in pPSV37, hybrid "Bmix" | Bmix | This study |
| pP37- <i>acrHpcrH</i> -PAB 40- <i>popD</i>                 | Plasmid encoding <i>acrH</i> , <i>pcrH</i> , <i>popD</i> and a <i>popB</i> (1-40L)- <i>aopB</i> (38T-390) hybrid under the control of the lacUV5 promoter in pPSV37, hybrid "B11"                                                                               | B11  | This study |
| pP37- <i>acrHpcrH</i> -PAPAPB 114-183-312-330- <i>popD</i> | Plasmid encoding <i>acrH</i> , <i>pcrH</i> , <i>popD</i> and a <i>popB</i> (1-114L)- <i>aopB</i> (108G-175I)- <i>popB</i> (183G-311V)- <i>aopB</i> (312S-330A)- <i>popB</i> (331Q-390) hybrid under the control of the lacUV5 promoter in pPSV37, hybrid "B12"  | B12  | This study |
| pP37- <i>acrHpcrH</i> -PAPAPB 131-183-312-330- <i>popD</i> | Plasmid encoding <i>acrH</i> , <i>pcrH</i> , <i>popD</i> and a <i>popB</i> (1-131T)- <i>aopB</i> (126I-175I)- <i>popB</i> (183G-311V)- <i>aopB</i> (312S-330A)- <i>popB</i> (331Q-390) hybrid under the control of the lacUV5 promoter in pPSV37, hybrid "B13"  | B13  | This study |
| pP37- <i>acrHpcrH</i> -PAPAPB 131-169-312-330- <i>popD</i> | Plasmid encoding <i>acrH</i> , <i>pcrH</i> , <i>popD</i> and a <i>popB</i> (1-131T)- <i>aopB</i> (125D-175I)- <i>popB</i> (183G-311V)- <i>aopB</i> (312S-330A)- <i>popB</i> (331Q-390) hybrid under the control of the lacUV5 promoter in pPSV37, hybrid "B14"  | B14  | This study |
| pP37- <i>acrHpcrH</i> -PAPAPB 151-183-312-330- <i>popD</i> | Plasmid encoding <i>acrH</i> , <i>pcrH</i> , <i>popD</i> and a <i>popB</i> (1-151I)- <i>aopB</i> (145K-175I)- <i>popB</i> (183G-311V)- <i>aopB</i> (312S-330A)- <i>popB</i> (331Q-390) hybrid under the control of the lacUV5 promoter in pPSV37, hybrid "B15"  | B15  | This study |
| pP37- <i>acrHpcrH</i> -PAB 114- <i>popD</i>                | Plasmid encoding <i>acrH</i> , <i>pcrH</i> , <i>popD</i> and a <i>popB</i> (1-114L)- <i>aopB</i> (108G-390) hybrid under the control of the lacUV5 promoter in pPSV37, hybrid "B16"                                                                             | B16  | This study |
| pP37- <i>acrHpcrH</i> -PAB 168- <i>popD</i>                | Plasmid encoding <i>acrH</i> , <i>pcrH</i> , <i>popD</i> and a <i>popB</i> (1-168A)- <i>aopB</i> (162K-390) hybrid under the control of the lacUV5 promoter in pPSV37, hybrid "B17"                                                                             | B17  | This study |
| pP37- <i>acrHpcrH</i> -PAB 297- <i>popD</i>                | Plasmid encoding <i>acrH</i> , <i>pcrH</i> , <i>popD</i> and a <i>popB</i> (1-296H)- <i>aopB</i> (270A-390) hybrid under the control of the lacUV5 promoter in pPSV37, hybrid "B18"                                                                             | B18  | This study |

|                                                                   |                                                                                                                                                                                                                                         |     |                 |
|-------------------------------------------------------------------|-----------------------------------------------------------------------------------------------------------------------------------------------------------------------------------------------------------------------------------------|-----|-----------------|
| pP37- <i>acrHpcrH</i> -PAB 330- <i>popD</i>                       | Plasmid encoding <i>acrH</i> , <i>pcrH</i> , <i>popD</i> and a <i>popB</i> (1-330R)- <i>aopB</i> (331Q-390) hybrid under the control of the lacUV5 promoter in pPSV37, hybrid "B19"                                                     | B19 | This study      |
| pP37- <i>acrHpcrH</i> -APB 115- <i>popD</i>                       | Plasmid encoding <i>acrH</i> , <i>pcrH</i> , <i>popD</i> and a <i>aopB</i> (1-107L)- <i>popB</i> (115A-390) hybrid under the control of the lacUV5 promoter in pPSV37, hybrid "B20"                                                     | B20 | This study      |
| pP37- <i>acrHpcrH</i> -APB 251- <i>popD</i>                       | Plasmid encoding <i>acrH</i> , <i>pcrH</i> , <i>popD</i> and a <i>aopB</i> (1-243G)- <i>popB</i> (251G-390) hybrid under the control of the lacUV5 promoter in pPSV37, hybrid "B21"                                                     | B21 | This study      |
| pP37- <i>acrHpcrH</i> -APB 298- <i>popD</i>                       | Plasmid encoding <i>acrH</i> , <i>pcrH</i> , <i>popD</i> and a <i>aopB</i> (1-297V)- <i>popB</i> (298L-390) hybrid under the control of the lacUV5 promoter in pPSV37, hybrid "B22"                                                     | B22 | This study      |
| pP37- <i>acrHpcrH</i> -APB 323- <i>popD</i>                       | Plasmid encoding <i>acrH</i> , <i>pcrH</i> , <i>popD</i> and a <i>aopB</i> (1-322V)- <i>popB</i> (323F-390) hybrid under the control of the lacUV5 promoter in pPSV37, hybrid "B23"                                                     | B23 | This study      |
| pP37- <i>acrHpcrH</i> -APB 369- <i>popD</i>                       | Plasmid encoding <i>acrH</i> , <i>pcrH</i> , <i>popD</i> and a <i>aopB</i> (1-368M)- <i>popB</i> (369I-390) hybrid under the control of the lacUV5 promoter in pPSV37, hybrid "B24"                                                     | B24 | This study      |
| pPGEH- <i>acrHpcrH</i> - <i>popBD</i>                             | Plasmid encoding <i>acrH</i> , <i>pcrH</i> , <i>popB</i> and <i>popD</i> under control of the <i>pcrG</i> promoter                                                                                                                      |     | This study      |
| pPGEH- <i>acrHpcrH</i> -Bmix- <i>popD</i>                         | Plasmid encoding <i>acrH</i> , <i>pcrH</i> , <i>popD</i> and a <i>popB</i> (1-114L)- <i>aopB</i> (108G-143K)- <i>popB</i> (150K-311V)- <i>aopB</i> (312S-330A)- <i>popB</i> (331Q-390) hybrid under control of the <i>pcrG</i> promoter |     | This study      |
| pP37- <i>acrHpcrH</i> - <i>popB</i> (Q135C)- <i>popD</i>          | Plasmid encoding <i>acrH</i> , <i>pcrH</i> , <i>popB</i> (Q135C) and <i>popD</i> under the control of the lacUV5 promoter in pPSV37                                                                                                     |     | This study      |
| pP37- <i>acrHpcrH</i> - <i>popB</i> (S321C)- <i>popD</i>          | Plasmid encoding <i>acrH</i> , <i>pcrH</i> , <i>popB</i> (S321C) and <i>popD</i> under the control of the lacUV5 promoter in pPSV37                                                                                                     |     | This study      |
| pP37- <i>acrHpcrH</i> - <i>popB</i> (S321C, 225VSVG)- <i>popD</i> | Plasmid encoding <i>acrH</i> , <i>pcrH</i> , <i>popB</i> (S321C, 225-VSVG) and <i>popD</i> under the control of the lacUV5 promoter in pPSV37. PopB has 4x VSV-G tag inserted after codon 225.                                          |     | This study      |
| pEXG2- <i>pcrV</i> (Q87C)                                         | Allelic exchange vector designed to introduce Q87C mutation in <i>pcrV</i> .                                                                                                                                                            |     | Armentrout 2016 |
